# Supplementary material
Source: publisher figshare collection journal article supplement (https://frontiersin.figshare.com/ndownloader/files/21769386)
Supplement: Supplementary file [file 21769386]

***ZmCCA1a* on Chromosome 10 of Maize Delays Flowering of *Arabidopsis thaliana***

**Yong shi<sup>1†</sup>, Xiyong Zhao<sup>3†</sup>, Sha Guo<sup>1</sup>, Shifeng Dong<sup>1</sup>, Yanpeng Wen<sup>1</sup>,  
Zanping Han<sup>4</sup>, Weihuan Jin<sup>2\*</sup>, Yanhui Chen<sup>1\*</sup>**

<sup>1</sup>College of Agronomy/National Key Laboratory of Wheat and Maize Crop Science, Henan Agricultural University, Zhengzhou, Henan, China

<sup>2</sup>College of Life Sciences, Henan Agricultural University, Zhengzhou, Henan, China

<sup>3</sup>Crop Research Institute, Anhui Academy of Agricultural Sciences, Hefei, Anhui, China

<sup>4</sup>College of Agronomy, Henan University of Science and Technology, Luoyang, Henan, China

**† These authors contributed equally to this work.**

**\* Correspondence:**

Yanhui Chen, Agricultural College, Henan Agricultural University, Zhengzhou, Henan, China

e-mail: chy9890@163.com

Weihuan Jin, College of Life Sciences, Henan Agricultural University, Zhengzhou, Henan, China

e-mail: Jinjinwh@163.com

**Keywords:** *maize*, *ZmCCA1*, overexpression, circadian rhythms, photoperiodic flowering





|  |  |  |  |  |  |  |  |  |  |  |  |  |  |  |  |  |  |  |  |  |  |  |  |  |  |  |  |  |  |  |  |  |  |  |  |  |  |  |  |  |  |  |  |  |  |  |  |  |  |  |  |  |  |  |  |  |  |  |  |  |  |  |  |  |  |  |  |  |  |  |  |  |  |  |  |  |  |  |  |  |  |  |  |  |  |  |  |  |  |  |  |  |  |  |  |  |  |  |  |  |  |  |  |  |  |  |  |  |  |  |  |  |  |  |  |  |  |  |  |  |  |  |  |  |  |  |  |  |  |  |  |  |  |  |  |  |  |  |  |  |  |  |  |  |  |  |  |  |  |  |  |  |  |  |  |  |  |  |  |  |  |  |  |  |  |  |  |  |  |  |  |  |  |  |  |  |  |  |  |  |  |  |  |  |  |  |  |  |  |  |  |  |  |  |  |  |  |  |  |  |  |  |  |  |  |  |  |  |  |  |  |  |  |  |  |  |  |  |  |  |  |  |  |  |  |  |  |  |  |  |  |  |  |  |  |  |  |  |  |  |  |  |  |  |  |  |  |  |  |  |  |  |  |  |  |  |  |  |  |  |  |  |  |  |  |  |  |  |  |  |  |  |  |  |  |  |  |  |  |  |  |  |  |  |  |  |  |  |  |  |  |  |  |  |  |  |  |  |  |  |  |  |  |  |  |  |  |  |  |  |  |  |  |  |  |  |  |  |  |  |  |  |  |  |  |  |  |  |  |  |  |  |  |  |  |  |  |  |  |  |  |  |  |  |  |  |  |  |  |  |  |  |  |  |  |  |  |  |  |  |  |  |  |  |  |  |  |  |  |  |  |  |  |  |  |  |  |  |  |  |  |  |  |  |  |  |  |  |  |  |  |  |  |  |  |  |  |  |  |  |  |  |  |  |  |  |  |  |  |  |  |  |  |  |  |  |  |  |  |  |  |  |  |  |  |  |  |  |  |  |  |  |  |  |  |  |  |  |  |  |  |  |  |  |  |  |  |  |  |  |  |  |  |  |  |  |  |  |  |  |  |  |  |  |  |  |  |  |  |  |  |  |  |  |  |  |  |  |  |  |  |  |  |  |  |  |  |  |  |  |  |  |  |  |  |  |  |  |  |  |  |  |  |  |  |  |  |  |  |  |  |  |  |  |  |  |  |  |  |  |  |  |  |  |  |  |  |  |  |  |  |  |  |  |  |  |  |  |  |  |  |  |  |  |  |  |  |  |  |  |  |  |  |  |  |  |  |  |  |  |  |  |  |  |  |  |  |  |  |  |  |  |  |  |  |  |  |  |  |  |  |  |  |  |  |  |  |  |  |  |  |  |  |  |  |  |  |  |  |  |  |  |  |  |  |  |  |  |  |  |  |  |  |  |  |  |  |  |  |  |  |  |  |  |  |  |  |  |  |  |  |  |  |  |  |  |  |  |  |  |  |  |  |  |  |  |  |  |  |  |  |  |  |  |  |  |  |  |  |  |  |  |  |  |  |  |  |  |  |  |  |  |  |  |  |  |  |  |  |  |  |  |  |  |  |  |  |  |  |  |  |  |  |  |  |  |  |  |  |  |  |  |  |  |  |  |  |  |  |  |  |  |  |  |  |  |  |  |  |  |  |  |  |  |  |  |  |  |  |  |  |  |  |  |  |  |  |  |  |  |  |  |  |  |  |  |  |  |  |  |  |  |  |  |  |  |  |  |  |  |  |  |  |  |  |  |  |  |  |  |  |  |  |  |  |  |  |  |  |  |  |  |  |  |  |  |  |  |  |  |  |  |  |  |  |  |  |  |  |  |  |  |  |  |  |  |  |  |  |  |  |  |  |  |  |  |  |  |  |  |  |  |  |  |  |  |  |  |  |  |  |  |  |  |  |  |  |  |  |  |  |  |  |  |  |  |  |  |  |  |  |  |  |  |  |  |  |  |  |  |  |  |  |  |  |  |  |  |  |  |  |  |  |  |  |  |  |  |  |  |  |  |  |  |  |  |  |  |  |  |  |  |  |  |  |  |  |  |  |  |  |  |  |  |  |  |  |  |  |  |  |  |  |  |  |  |  |  |  |  |  |  |  |  |  |  |  |  |  |  |  |  |  |  |  |  |  |  |  |  |  |  |  |  |  |  |  |  |  |  |  |  |  |  |  |  |  |  |  |  |  |  |  |  |  |  |  |  |  |  |  |  |  |  |  |  |  |  |  |  |  |  |  |  |  |  |  |  |  |  |  |  |  |  |  |  |  |  |  |  |  |  |  |  |  |  |  |  |  |  |  |  |  |  |  |  |  |  |  |  |  |  |  |  |  |  |  |  |  |  |  |  |  |  |  |  |  |  |  |  |  |  |  |  |  |  |  |  |  |  |  |  |  |  |  |  |  |  |  |  |  |  |  |  |  |  |  |  |  |  |  |  |  |  |  |  |  |  |  |  |  |  |  |  |  |  |  |  |  |  |  |  |  |  |  |  |  |  |  |  |  |  |  |  |  |  |  |  |  |  |  |  |  |  |  |  |  |  |  |  |  |  |  |  |  |  |  |  |  |  |  |  |  |  |  |  |  |  |  |  |  |  |  |  |  |  |  |  |  |  |  |  |  |  |  |  |  |  |  |  |  |  |  |  |  |  |  |  |  |  |  |  |  |  |  |  |  |  |  |  |  |  |  |  |  |  |  |  |  |  |  |  |  |  |  |  |  |  |  |  |  |  |  |  |  |  |  |  |  |  |  |  |  |  |  |  |  |  |  |  |  |  |  |  |  |  |  |  |  |  |  |  |  |  |  |  |  |  |  |  |  |  |  |  |  |  |  |  |  |  |  |  |  |  |  |  |  |  |  |  |  |  |  |  |  |  |  |  |  |  |  |  |  |  |  |  |  |  |  |  |  |  |  |  |  |  |  |  |  |  |  |  |  |  |  |  |  |  |  |  |  |  |  |  |  |  |  |  |  |  |  |  |  |  |  |  |  |  |  |  |  |  |  |  |  |  |  |  |  |  |  |  |  |  |  |  |  |  |  |  |  |  |  |  |  |  |  |  |  |  |  |  |  |  |  |  |  |  |  |  |  |  |  |  |    |
|--|--|--|--|--|--|--|--|--|--|--|--|--|--|--|--|--|--|--|--|--|--|--|--|--|--|--|--|--|--|--|--|--|--|--|--|--|--|--|--|--|--|--|--|--|--|--|--|--|--|--|--|--|--|--|--|--|--|--|--|--|--|--|--|--|--|--|--|--|--|--|--|--|--|--|--|--|--|--|--|--|--|--|--|--|--|--|--|--|--|--|--|--|--|--|--|--|--|--|--|--|--|--|--|--|--|--|--|--|--|--|--|--|--|--|--|--|--|--|--|--|--|--|--|--|--|--|--|--|--|--|--|--|--|--|--|--|--|--|--|--|--|--|--|--|--|--|--|--|--|--|--|--|--|--|--|--|--|--|--|--|--|--|--|--|--|--|--|--|--|--|--|--|--|--|--|--|--|--|--|--|--|--|--|--|--|--|--|--|--|--|--|--|--|--|--|--|--|--|--|--|--|--|--|--|--|--|--|--|--|--|--|--|--|--|--|--|--|--|--|--|--|--|--|--|--|--|--|--|--|--|--|--|--|--|--|--|--|--|--|--|--|--|--|--|--|--|--|--|--|--|--|--|--|--|--|--|--|--|--|--|--|--|--|--|--|--|--|--|--|--|--|--|--|--|--|--|--|--|--|--|--|--|--|--|--|--|--|--|--|--|--|--|--|--|--|--|--|--|--|--|--|--|--|--|--|--|--|--|--|--|--|--|--|--|--|--|--|--|--|--|--|--|--|--|--|--|--|--|--|--|--|--|--|--|--|--|--|--|--|--|--|--|--|--|--|--|--|--|--|--|--|--|--|--|--|--|--|--|--|--|--|--|--|--|--|--|--|--|--|--|--|--|--|--|--|--|--|--|--|--|--|--|--|--|--|--|--|--|--|--|--|--|--|--|--|--|--|--|--|--|--|--|--|--|--|--|--|--|--|--|--|--|--|--|--|--|--|--|--|--|--|--|--|--|--|--|--|--|--|--|--|--|--|--|--|--|--|--|--|--|--|--|--|--|--|--|--|--|--|--|--|--|--|--|--|--|--|--|--|--|--|--|--|--|--|--|--|--|--|--|--|--|--|--|--|--|--|--|--|--|--|--|--|--|--|--|--|--|--|--|--|--|--|--|--|--|--|--|--|--|--|--|--|--|--|--|--|--|--|--|--|--|--|--|--|--|--|--|--|--|--|--|--|--|--|--|--|--|--|--|--|--|--|--|--|--|--|--|--|--|--|--|--|--|--|--|--|--|--|--|--|--|--|--|--|--|--|--|--|--|--|--|--|--|--|--|--|--|--|--|--|--|--|--|--|--|--|--|--|--|--|--|--|--|--|--|--|--|--|--|--|--|--|--|--|--|--|--|--|--|--|--|--|--|--|--|--|--|--|--|--|--|--|--|--|--|--|--|--|--|--|--|--|--|--|--|--|--|--|--|--|--|--|--|--|--|--|--|--|--|--|--|--|--|--|--|--|--|--|--|--|--|--|--|--|--|--|--|--|--|--|--|--|--|--|--|--|--|--|--|--|--|--|--|--|--|--|--|--|--|--|--|--|--|--|--|--|--|--|--|--|--|--|--|--|--|--|--|--|--|--|--|--|--|--|--|--|--|--|--|--|--|--|--|--|--|--|--|--|--|--|--|--|--|--|--|--|--|--|--|--|--|--|--|--|--|--|--|--|--|--|--|--|--|--|--|--|--|--|--|--|--|--|--|--|--|--|--|--|--|--|--|--|--|--|--|--|--|--|--|--|--|--|--|--|--|--|--|--|--|--|--|--|--|--|--|--|--|--|--|--|--|--|--|--|--|--|--|--|--|--|--|--|--|--|--|--|--|--|--|--|--|--|--|--|--|--|--|--|--|--|--|--|--|--|--|--|--|--|--|--|--|--|--|--|--|--|--|--|--|--|--|--|--|--|--|--|--|--|--|--|--|--|--|--|--|--|--|--|--|--|--|--|--|--|--|--|--|--|--|--|--|--|--|--|--|--|--|--|--|--|--|--|--|--|--|--|--|--|--|--|--|--|--|--|--|--|--|--|--|--|--|--|--|--|--|--|--|--|--|--|--|--|--|--|--|--|--|--|--|--|--|--|--|--|--|--|--|--|--|--|--|--|--|--|--|--|--|--|--|--|--|--|--|--|--|--|--|--|--|--|--|--|--|--|--|--|--|--|--|--|--|--|--|--|--|--|--|--|--|--|--|--|--|--|--|--|--|--|--|--|--|--|--|--|--|--|--|--|--|--|--|--|--|--|--|--|--|--|--|--|--|--|--|--|--|--|--|--|--|--|--|--|--|--|--|--|--|--|--|--|--|--|--|--|--|--|--|--|--|--|--|--|--|--|--|--|--|--|--|--|--|--|--|--|--|--|--|--|--|--|--|--|--|--|--|--|--|--|--|--|--|--|--|--|--|--|--|--|--|--|--|--|--|--|--|--|--|--|--|--|--|--|--|--|--|--|--|--|--|--|--|--|--|--|--|--|--|--|--|--|--|--|--|--|--|--|--|--|--|--|--|--|--|--|--|--|--|--|--|--|--|--|--|--|--|--|--|--|--|--|--|--|--|--|--|--|--|--|--|--|--|--|--|--|--|--|--|--|--|--|--|--|--|--|--|--|--|--|--|--|--|--|--|--|--|--|--|--|--|--|--|--|--|--|--|--|--|--|--|--|--|--|--|--|--|--|--|--|--|--|--|--|--|--|--|--|--|--|--|--|--|--|--|--|--|--|--|--|--|--|--|--|--|--|--|--|--|--|--|--|--|--|--|--|--|--|--|--|--|--|--|--|--|--|--|--|--|--|--|--|--|--|--|--|--|--|--|--|--|--|--|--|--|--|--|--|--|--|--|--|--|--|--|--|--|--|--|--|--|--|--|--|--|--|--|--|--|--|--|--|--|--|--|--|--|--|--|--|--|--|--|--|--|--|--|--|--|--|--|--|--|--|--|--|--|--|--|--|--|--|--|--|--|--|--|--|--|--|--|--|--|--|--|--|--|--|--|--|--|--|--|--|--|--|--|--|--|--|--|--|--|--|--|--|--|--|--|--|--|--|--|--|--|--|--|--|--|--|--|--|--|--|--|----|
|  |  |  |  |  |  |  |  |  |  |  |  |  |  |  |  |  |  |  |  |  |  |  |  |  |  |  |  |  |  |  |  |  |  |  |  |  |  |  |  |  |  |  |  |  |  |  |  |  |  |  |  |  |  |  |  |  |  |  |  |  |  |  |  |  |  |  |  |  |  |  |  |  |  |  |  |  |  |  |  |  |  |  |  |  |  |  |  |  |  |  |  |  |  |  |  |  |  |  |  |  |  |  |  |  |  |  |  |  |  |  |  |  |  |  |  |  |  |  |  |  |  |  |  |  |  |  |  |  |  |  |  |  |  |  |  |  |  |  |  |  |  |  |  |  |  |  |  |  |  |  |  |  |  |  |  |  |  |  |  |  |  |  |  |  |  |  |  |  |  |  |  |  |  |  |  |  |  |  |  |  |  |  |  |  |  |  |  |  |  |  |  |  |  |  |  |  |  |  |  |  |  |  |  |  |  |  |  |  |  |  |  |  |  |  |  |  |  |  |  |  |  |  |  |  |  |  |  |  |  |  |  |  |  |  |  |  |  |  |  |  |  |  |  |  |  |  |  |  |  |  |  |  |  |  |  |  |  |  |  |  |  |  |  |  |  |  |  |  |  |  |  |  |  |  |  |  |  |  |  |  |  |  |  |  |  |  |  |  |  |  |  |  |  |  |  |  |  |  |  |  |  |  |  |  |  |  |  |  |  |  |  |  |  |  |  |  |  |  |  |  |  |  |  |  |  |  |  |  |  |  |  |  |  |  |  |  |  |  |  |  |  |  |  |  |  |  |  |  |  |  |  |  |  |  |  |  |  |  |  |  |  |  |  |  |  |  |  |  |  |  |  |  |  |  |  |  |  |  |  |  |  |  |  |  |  |  |  |  |  |  |  |  |  |  |  |  |  |  |  |  |  |  |  |  |  |  |  |  |  |  |  |  |  |  |  |  |  |  |  |  |  |  |  |  |  |  |  |  |  |  |  |  |  |  |  |  |  |  |  |  |  |  |  |  |  |  |  |  |  |  |  |  |  |  |  |  |  |  |  |  |  |  |  |  |  |  |  |  |  |  |  |  |  |  |  |  |  |  |  |  |  |  |  |  |  |  |  |  |  |  |  |  |  |  |  |  |  |  |  |  |  |  |  |  |  |  |  |  |  |  |  |  |  |  |  |  |  |  |  |  |  |  |  |  |  |  |  |  |  |  |  |  |  |  |  |  |  |  |  |  |  |  |  |  |  |  |  |  |  |  |  |  |  |  |  |  |  |  |  |  |  |  |  |  |  |  |  |  |  |  |  |  |  |  |  |  |  |  |  |  |  |  |  |  |  |  |  |  |  |  |  |  |  |  |  |  |  |  |  |  |  |  |  |  |  |  |  |  |  |  |  |  |  |  |  |  |  |  |  |  |  |  |  |  |  |  |  |  |  |  |  |  |  |  |  |  |  |  |  |  |  |  |  |  |  |  |  |  |  |  |  |  |  |  |  |  |  |  |  |  |  |  |  |  |  |  |  |  |  |  |  |  |  |  |  |  |  |  |  |  |  |  |  |  |  |  |  |  |  |  |  |  |  |  |  |  |  |  |  |  |  |  |  |  |  |  |  |  |  |  |  |  |  |  |  |  |  |  |  |  |  |  |  |  |  |  |  |  |  |  |  |  |  |  |  |  |  |  |  |  |  |  |  |  |  |  |  |  |  |  |  |  |  |  |  |  |  |  |  |  |  |  |  |  |  |  |  |  |  |  |  |  |  |  |  |  |  |  |  |  |  |  |  |  |  |  |  |  |  |  |  |  |  |  |  |  |  |  |  |  |  |  |  |  |  |  |  |  |  |  |  |  |  |  |  |  |  |  |  |  |  |  |  |  |  |  |  |  |  |  |  |  |  |  |  |  |  |  |  |  |  |  |  |  |  |  |  |  |  |  |  |  |  |  |  |  |  |  |  |  |  |  |  |  |  |  |  |  |  |  |  |  |  |  |  |  |  |  |  |  |  |  |  |  |  |  |  |  |  |  |  |  |  |  |  |  |  |  |  |  |  |  |  |  |  |  |  |  |  |  |  |  |  |  |  |  |  |  |  |  |  |  |  |  |  |  |  |  |  |  |  |  |  |  |  |  |  |  |  |  |  |  |  |  |  |  |  |  |  |  |  |  |  |  |  |  |  |  |  |  |  |  |  |  |  |  |  |  |  |  |  |  |  |  |  |  |  |  |  |  |  |  |  |  |  |  |  |  |  |  |  |  |  |  |  |  |  |  |  |  |  |  |  |  |  |  |  |  |  |  |  |  |  |  |  |  |  |  |  |  |  |  |  |  |  |  |  |  |  |  |  |  |  |  |  |  |  |  |  |  |  |  |  |  |  |  |  |  |  |  |  |  |  |  |  |  |  |  |  |  |  |  |  |  |  |  |  |  |  |  |  |  |  |  |  |  |  |  |  |  |  |  |  |  |  |  |  |  |  |  |  |  |  |  |  |  |  |  |  |  |  |  |  |  |  |  |  |  |  |  |  |  |  |  |  |  |  |  |  |  |  |  |  |  |  |  |  |  |  |  |  |  |  |  |  |  |  |  |  |  |  |  |  |  |  |  |  |  |  |  |  |  |  |  |  |  |  |  |  |  |  |  |  |  |  |  |  |  |  |  |  |  |  |  |  |  |  |  |  |  |  |  |  |  |  |  |  |  |  |  |  |  |  |  |  |  |  |  |  |  |  |  |  |  |  |  |  |  |  |  |  |  |  |  |  |  |  |  |  |  |  |  |  |  |  |  |  |  |  |  |  |  |  |  |  |  |  |  |  |  |  |  |  |  |  |  |  |  |  |  |  |  |  |  |  |  |  |  |  |  |  |  |  |  |  |  |  |  |  |  |  |  |  |  |  |  |  |  |  |  |  |  |  |  |  |  |  |  |  |  |  |  |  |  |  |  |  |  |  |  |  |  |  |  |  |  |  |  |  |  |  |  |  |  |  |  |  |  |  |  |  |  |  |  |  |  |  |  |  |  |  |  |  |  |  |  |  |  |  |  |  |  |  |  |  |  |  |  |  |  |  |  |  |  |  |  |  |  |  |  |  |  |  |  | </ |
|--|--|--|--|--|--|--|--|--|--|--|--|--|--|--|--|--|--|--|--|--|--|--|--|--|--|--|--|--|--|--|--|--|--|--|--|--|--|--|--|--|--|--|--|--|--|--|--|--|--|--|--|--|--|--|--|--|--|--|--|--|--|--|--|--|--|--|--|--|--|--|--|--|--|--|--|--|--|--|--|--|--|--|--|--|--|--|--|--|--|--|--|--|--|--|--|--|--|--|--|--|--|--|--|--|--|--|--|--|--|--|--|--|--|--|--|--|--|--|--|--|--|--|--|--|--|--|--|--|--|--|--|--|--|--|--|--|--|--|--|--|--|--|--|--|--|--|--|--|--|--|--|--|--|--|--|--|--|--|--|--|--|--|--|--|--|--|--|--|--|--|--|--|--|--|--|--|--|--|--|--|--|--|--|--|--|--|--|--|--|--|--|--|--|--|--|--|--|--|--|--|--|--|--|--|--|--|--|--|--|--|--|--|--|--|--|--|--|--|--|--|--|--|--|--|--|--|--|--|--|--|--|--|--|--|--|--|--|--|--|--|--|--|--|--|--|--|--|--|--|--|--|--|--|--|--|--|--|--|--|--|--|--|--|--|--|--|--|--|--|--|--|--|--|--|--|--|--|--|--|--|--|--|--|--|--|--|--|--|--|--|--|--|--|--|--|--|--|--|--|--|--|--|--|--|--|--|--|--|--|--|--|--|--|--|--|--|--|--|--|--|--|--|--|--|--|--|--|--|--|--|--|--|--|--|--|--|--|--|--|--|--|--|--|--|--|--|--|--|--|--|--|--|--|--|--|--|--|--|--|--|--|--|--|--|--|--|--|--|--|--|--|--|--|--|--|--|--|--|--|--|--|--|--|--|--|--|--|--|--|--|--|--|--|--|--|--|--|--|--|--|--|--|--|--|--|--|--|--|--|--|--|--|--|--|--|--|--|--|--|--|--|--|--|--|--|--|--|--|--|--|--|--|--|--|--|--|--|--|--|--|--|--|--|--|--|--|--|--|--|--|--|--|--|--|--|--|--|--|--|--|--|--|--|--|--|--|--|--|--|--|--|--|--|--|--|--|--|--|--|--|--|--|--|--|--|--|--|--|--|--|--|--|--|--|--|--|--|--|--|--|--|--|--|--|--|--|--|--|--|--|--|--|--|--|--|--|--|--|--|--|--|--|--|--|--|--|--|--|--|--|--|--|--|--|--|--|--|--|--|--|--|--|--|--|--|--|--|--|--|--|--|--|--|--|--|--|--|--|--|--|--|--|--|--|--|--|--|--|--|--|--|--|--|--|--|--|--|--|--|--|--|--|--|--|--|--|--|--|--|--|--|--|--|--|--|--|--|--|--|--|--|--|--|--|--|--|--|--|--|--|--|--|--|--|--|--|--|--|--|--|--|--|--|--|--|--|--|--|--|--|--|--|--|--|--|--|--|--|--|--|--|--|--|--|--|--|--|--|--|--|--|--|--|--|--|--|--|--|--|--|--|--|--|--|--|--|--|--|--|--|--|--|--|--|--|--|--|--|--|--|--|--|--|--|--|--|--|--|--|--|--|--|--|--|--|--|--|--|--|--|--|--|--|--|--|--|--|--|--|--|--|--|--|--|--|--|--|--|--|--|--|--|--|--|--|--|--|--|--|--|--|--|--|--|--|--|--|--|--|--|--|--|--|--|--|--|--|--|--|--|--|--|--|--|--|--|--|--|--|--|--|--|--|--|--|--|--|--|--|--|--|--|--|--|--|--|--|--|--|--|--|--|--|--|--|--|--|--|--|--|--|--|--|--|--|--|--|--|--|--|--|--|--|--|--|--|--|--|--|--|--|--|--|--|--|--|--|--|--|--|--|--|--|--|--|--|--|--|--|--|--|--|--|--|--|--|--|--|--|--|--|--|--|--|--|--|--|--|--|--|--|--|--|--|--|--|--|--|--|--|--|--|--|--|--|--|--|--|--|--|--|--|--|--|--|--|--|--|--|--|--|--|--|--|--|--|--|--|--|--|--|--|--|--|--|--|--|--|--|--|--|--|--|--|--|--|--|--|--|--|--|--|--|--|--|--|--|--|--|--|--|--|--|--|--|--|--|--|--|--|--|--|--|--|--|--|--|--|--|--|--|--|--|--|--|--|--|--|--|--|--|--|--|--|--|--|--|--|--|--|--|--|--|--|--|--|--|--|--|--|--|--|--|--|--|--|--|--|--|--|--|--|--|--|--|--|--|--|--|--|--|--|--|--|--|--|--|--|--|--|--|--|--|--|--|--|--|--|--|--|--|--|--|--|--|--|--|--|--|--|--|--|--|--|--|--|--|--|--|--|--|--|--|--|--|--|--|--|--|--|--|--|--|--|--|--|--|--|--|--|--|--|--|--|--|--|--|--|--|--|--|--|--|--|--|--|--|--|--|--|--|--|--|--|--|--|--|--|--|--|--|--|--|--|--|--|--|--|--|--|--|--|--|--|--|--|--|--|--|--|--|--|--|--|--|--|--|--|--|--|--|--|--|--|--|--|--|--|--|--|--|--|--|--|--|--|--|--|--|--|--|--|--|--|--|--|--|--|--|--|--|--|--|--|--|--|--|--|--|--|--|--|--|--|--|--|--|--|--|--|--|--|--|--|--|--|--|--|--|--|--|--|--|--|--|--|--|--|--|--|--|--|--|--|--|--|--|--|--|--|--|--|--|--|--|--|--|--|--|--|--|--|--|--|--|--|--|--|--|--|--|--|--|--|--|--|--|--|--|--|--|--|--|--|--|--|--|--|--|--|--|--|--|--|--|--|--|--|--|--|--|--|--|--|--|--|--|--|--|--|--|--|--|--|--|--|--|--|--|--|--|--|--|--|--|--|--|--|--|--|--|--|--|--|--|--|--|--|--|--|--|--|--|--|--|--|--|--|--|--|--|--|--|--|--|--|--|--|--|--|--|--|--|--|--|--|--|--|--|--|--|--|--|--|--|--|--|--|--|--|--|--|--|--|--|--|--|--|--|--|--|--|--|--|--|--|--|--|--|--|--|--|--|--|--|--|--|--|--|--|--|--|--|--|--|--|--|--|--|--|--|--|--|--|----|

**Supplementary Figure 2** Sequence alignment of deduced amino acid sequence of ZmCCA1b in maize inbred lines CML288 and HZ4

Amino acid residues identical between ZmCCA1b in CML288 and HZ4 are highlighted in black. Conserved sequences of Myb domains of the *CCA1* and *CCA1-like* genes are enclosed in the red box. Arabic numerals at the right of the sequences show positions of the last amino acid residues of corresponding proteins indicated at the right.



|           |                                                                                   |     |   |
|-----------|-----------------------------------------------------------------------------------|-----|---|
|           | *                                                                                 | *   | * |
| ZmCCA1a   | MENVSSGEETVIKVRKPYTITKCRERWTEAEHKRFIFALKLYGRAWQRIEEHVGTAVQIRSHAQCKFFTKLEKEAINNG   | 80  |   |
| ZmCCA1b   | MEMNSSGEETVVKVRKPYTITKCRERWTEAEHKRFIFALKLYGRAWQRIEEHVGTAVQIRSHAQCKFFTKLEKEAMNNG   | 80  |   |
| AtCCA1    | MEINSSGELIVIKTRKPYTITKCRERWTEEEHNRFFIHALYLGRAWQKIEEHVATKTAVQIRSHAQCKFFSKVEKEAEAKG | 80  |   |
| AtLHY     | MDINTSGEELIAKARKPYTITKCRERWTEDEHERFIFALRYLGRAWQRIEEHIGTKTAVQIRSHAQCKFFTKLEKEAEVKG | 80  |   |
| Consensus | m n sge k rkpytitkgrerwte eh rf eal lygrawq ieeh tktavqirshaqckff k ekea g        |     |   |
| <br>      |                                                                                   |     |   |
| ZmCCA1a   | TSPGCAHLIDIPFRPKRKANSFYPRKSGLSSETFTKELPSLKSTKENMPLSNENVIMAGDASIQKFQPKKLSEKESCSCE  | 160 |   |
| ZmCCA1b   | TSPGCAHLIDIPFRPKRKANSFYPRKSGLSSETCTKELPNLKSTKENMPLSNGHVMVGDAISIQNFQPKELSEKGSRSCE  | 160 |   |
| AtCCA1    | VAMGCALLIAIPFRPKRKNENFYPRKTCGSTILMSKTGVNLGKESLGSEKVSHPFEMANEDRCQSKPEEK.....       | 151 |   |
| AtLHY     | IPVCALLITEIPFRPKRKENTFYPRKFCNNGTSSSCVSSAKDAKLVSASSSCLNQAFILDLEKMPFSEKTSICKE....   | 156 |   |
| Consensus | qa di ippprpkrk n pyprk d k                                                       |     |   |
| <br>      |                                                                                   |     |   |
| ZmCCA1a   | VINLFRDAPSFSSSVNKSSSNHGAP..IEASKTKIRCDTIMENSINFMQLVKEINDQEMERINGTCISSKOEHSHE      | 238 |   |
| ZmCCA1b   | VINLFRDAPSAFSSSVNKSSSNHGAPRRTEASKTESRDMSIMENNSFNENTQELVKVISDQEMERINGTCIRSKOEHSHE  | 240 |   |
| AtCCA1    | .....LCFLNCSDCFTHQYLAAASSMNKSCIETSNA                                              | 182 |   |
| AtLHY     | .....NQLENCSCVSTVNKYPIPTKQVSGDIETSKT                                              | 187 |   |
| Consensus | e s                                                                               |     |   |
| <br>      |                                                                                   |     |   |
| ZmCCA1a   | CYLDISMCCMKLPESVETTDVCKQTARASHSLAEITGTISIPVTATEETHSVITSLCVGINGSMNPISHMFPAADPKFD   | 318 |   |
| ZmCCA1b   | CYLDISTCCMKLMFKSVETTYVDECTARASHTLAESNGIASVPVTVEEGTHEDCQTSQCVGINGSMNPCIHFMVSALPKFG | 320 |   |
| AtCCA1    | STFR...EFIFSR...EEGSCNNRVKRKESNS..CLNAKSLENGNEQGCPITYE.....MHIFVLVPLG.....SSITS   | 241 |   |
| AtLHY     | STVDNAVCLVFKKNKCLKGNDGTTVHSMQNYPWHFHACIVNGNIACPCNHESGMVSCDFMFHFMRREETHGHANLCATT   | 267 |   |
| Consensus |                                                                                   |     |   |
| <br>      |                                                                                   |     |   |
| ZmCCA1a   | SSATPQCFFPHNYAAFAPMCCNCNCDTHRSLVNMSSTFSSMLVSTLLSNPAIHAAARIAASYWPAAEGNTPIDFNENLA   | 398 |   |
| ZmCCA1b   | SSATPQCTFPHNYAAFAPMCCNCNCDTYRSFTNMSSTFSSMLVSTLLSNPAIHAAARIAASYWPAAEGNTPIDFNENPA   | 400 |   |
| AtCCA1    | SLSHFSEFLSHFHTV.....AGDYQS.....FPNHIMSTILLCTPALYTAAATFASSFWFPL...SSGGSPFVPGNS     | 303 |   |
| AtLHY     | SATTTASHQAFFACHS.....CDDYRSFIQISSTFSNLIMSTILLCNPAHAATAFAASVWPPYAASVGNSSGDSSTPMSS  | 339 |   |
| Consensus | s f still pa aa a swp                                                             |     |   |
| <br>      |                                                                                   |     |   |
| ZmCCA1a   | DGVQGRSIGSPFSMASIVAATVAASAASWWATQGLIPFEAEPMAFSFVPAPSAAFFTVDVPRPSEKLRDCPAENAQKECQE | 478 |   |
| ZmCCA1b   | DGVQGRNIGSPFSMASIVAATVAASAASWWATQGLIPFEAEPVAFPVAPSAAFFTVDVPRPSEKLRDCPVENAQNECQE   | 480 |   |
| AtCCA1    | .....FPNLAAMAATVAASAASWWAANGLIPLCAP.....ISSGGFTSHFFSTFGPSCDVEYTKASTICHGVSQ        | 367 |   |
| AtLHY     | S.....FPSITAIAATVAATAAWWASHGLIPVCAF.....APITCVFFSTVAVPTIAMTEMLTVENTIQPFQKON       | 404 |   |
| Consensus | pp aatvaasa awwa glip ap p                                                        |     |   |
| <br>      |                                                                                   |     |   |
| ZmCCA1a   | ARKQCQLEGFRVAASSEYDGSGKGEVSVHTELKISFPVQNADATSAAGALTTLAFMNKKKQDRSSCGSNTPSSSD...VDV | 555 |   |
| ZmCCA1b   | ARKQVCFEGLRVAASSEDGSGKGEVSLHTELKLSAQNADATPTTGACTNLAFRNKKKQDRSSCGSNTPSSSD...VDA    | 557 |   |
| AtCCA1    | SREQEHSEASK..ARRSLDSEL.....VENKSKFVCHEQPSATFESLAKGSLGAGLRKQVDRSSCGSNTPSSSDCDEADA  | 440 |   |
| AtLHY     | TALQDCNLASKSPAASSDSDSETGVTKLNACSKINDCKIEFVVVTAAVHLSNTAQKKNLVDRSSCGSNTPSGSD..AETDA | 483 |   |
| Consensus | q a s d k drsscgsgntps sd d                                                       |     |   |
| <br>      |                                                                                   |     |   |
| ZmCCA1a   | DNVPEKEGNANEKAKQASCNSAGDTNHRFRSSGS.....TSDSWKEVSEEGRIAFAHALFSREKI PQSFSFPQAEQS    | 629 |   |
| ZmCCA1b   | GNVPELEDNANEKAKQASCNSAGDTNHRFRSNGS.....TSDSWKEVSEEGRIAFAHALFSREKI PQSFSFPQAVDS    | 630 |   |
| AtCCA1    | SERQHDGTNGEVKETNETDNKFTSESNAARRSRISN.....ITDEWKSVDSEGRIAFAHALFSREVLPQSFTYREEHR.   | 513 |   |
| AtLHY     | LDKMKLKE.LVKETDE..NQFLVIELNNRKIKMRDNNNNNATSDSWKEVSEEGRIAFAHALFARERLPQSFSFPQVAE.   | 559 |   |
| Consensus | e k n r d wk vs egr af alf re lpgsf                                               |     |   |
| <br>      |                                                                                   |     |   |
| ZmCCA1a   | KEVGKKEELEVTTVAVDLINKSTTSIDHLDLTIGEPRASF PNELSPLKIKLSRQTGFKPYKRCSEAKENRVFASD..... | 703 |   |
| ZmCCA1b   | KEVAKEEEDEVTTTAVDLINKNATSIDHDDLTMDEPRASF PNELSHLIKLSRRTGFKPYKRCSEAKENRVPTS.....   | 705 |   |
| AtCCA1    | .EEEQQQEQCRYPMALDLINFATLTPVLDCEEKRNTEFIGIGLLASKLMSRGRTGFKPYKRCSEAKESTRILNNNFIHV   | 592 |   |
| AtLHY     | .NVNRKQSLTSMFLAF..NFKSQDSCAADQE.....GVVMIGVTICKSLKTRQTGFKPYKRCSEMEVESQVGNIN..NQS  | 629 |   |
| Consensus | a n tgfkpykrce ke                                                                 |     |   |
| <br>      |                                                                                   |     |   |
| ZmCCA1a   | .EVGTKRIRLSEAS                                                                    | 717 |   |
| ZmCCA1b   | .MVGTKRIRLSEAS                                                                    | 719 |   |
| AtCCA1    | EQKLEKRMRLTQAS                                                                    | 607 |   |
| AtLHY     | DEKVOKRIRLEGEAS                                                                   | 644 |   |
| Consensus | kr rl as                                                                          |     |   |



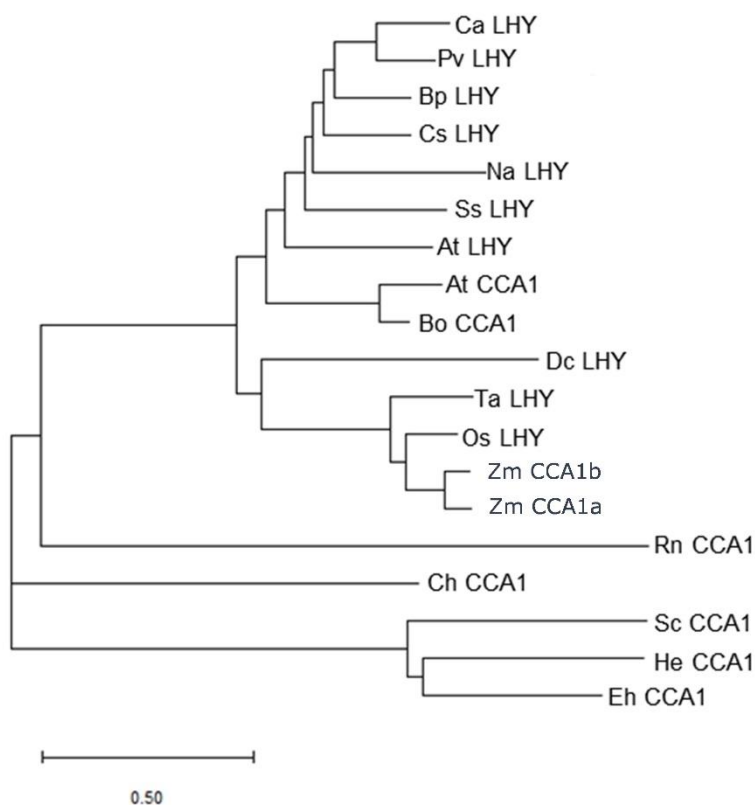

**Supplementary Figure 4** Phylogenetic analysis of ZmCCA1a and ZmCCA1b proteins from different organisms

Amino acid sequences were aligned using ClustalW and the phylogenetic tree was generated by the neighbor-joining method based on 1,000 bootstrap repetitions by MEGA X (<https://www.megasoftware.net/>). The scale bar represents the estimated number of amino acid substitutions per site. The deduced amino acid sequences were downloaded from NCBI (<http://www.ncbi.nlm.nih.gov/>). Gene identifiers for the deduced amino acid sequences are: ZmCCA1b: Zm00001d049543; ZmCCA1a: Zm00001d024546; AtCCA1:819296; AtLHY: 839341; OsLHY: 4344703; CsLHY: 1187396845; BpLHY: 942430200; TaLHY: 320091615; CaLHY: 830260220; PvLHY: 21213868; SsLHYGI:1600707748; DcLHY: 1315698992; NaLHY: 1102143005; BoCCA1: 1047389776; RnCCA1GI: 2564001; ScCCA1: 1023944721; HeCCA1GI: 1178017302; EhCCA1: 1174014980; ChCCA1: 1129247100.

|           |                                                                                   |      |  |
|-----------|-----------------------------------------------------------------------------------|------|--|
|           | *                                                                                 |      |  |
| CNL288    | CTCAATGTTGGTTGACCCACCTTGAGTTTGAGGGGTTGTTAGATGTATATAGATGGGTCTCTATGCTTTCTGTATTTCCCC | -457 |  |
| HZ4       | CTCAATGTTGGTTGACCCACCTTGAGTTTGAGGGGTTGTTAGATGTATATAGATGGGTCTCTATGCTTTCTGTATTTCCCC | -457 |  |
| Consensus | ctca tgtggttgacccaccttgagtttgaggggttgtagatgtatatagatgggtctctatgctttctgtatttcccc   |      |  |
| CNL288    | ATTGTATAAGTGGCTTAGTGCATATTTACAAGTGCTATTCATAACAGTAATTTACATTTCAAAGGAAGCACATGAATATT  | -377 |  |
| HZ4       | ATTGTATAAGTGGCTTAGTGCATATTTACAAGTGCTATTCATAACAGTAATTTACATTTCAAAGGAAGCACATGAATATT  | -377 |  |
| Consensus | attgtataagtggcttagtgcataatttacaagtgcatttcataacagtaatttacatttcaaaggaagcacatgaatatt |      |  |
| CNL288    | *                                                                                 |      |  |
| CNL288    | TAAATGCTGTTTGCTCTATCTTAACGCTTTTATGCAGAGTAAGGACAATTGGATCAATTTAAGTAGGTGAGTGGAATTGAT | -297 |  |
| HZ4       | TAAATGCTGTTTGCTCTATCTTAACGCTTTTATGCAGAGTAAGGACAATTGGATCAATTTAAGTAGGTGAGTGGAATTGAT | -297 |  |
| Consensus | taaatg tgttgctctatcttaacgcttttatgcagagtaaggacaattggatcaatttaagtaggtgagtggaattgat  |      |  |
| CNL288    | CCTTTTGAAGTTTCTGACCCCAAGTTCAATTCTACAGGTTTTCTCGTGTAATTTGACACTACTTTGGCTGCTCTTTTAGG  | -217 |  |
| HZ4       | CCTTTTGAAGTTTCTGACCCCAAGTTCAATTCTACAGGTTTTCTCGTGTAATTTGACACTACTTTGGCTGCTCTTTTAGG  | -217 |  |
| Consensus | ccttttgaagtttctgaccccagttcaattctacaggttttctcgtgtaaatttgacactactttggctgctcttttagg  |      |  |
| CNL288    | TCTGGGCACACAAATTTGAAC TATTAACGCATTGGGAGTGCTTGTGTGTTAGAGGTCTAGGAGGAGCTATGAGGTACTAC | -137 |  |
| HZ4       | TCTGGGCACACAAATTTGAAC TATTAACGCATTGGGAGTGCTTGTGTGTTAGAGGTCTAGGAGGAGCTATGAGGTACTAC | -137 |  |
| Consensus | tctgggcacacaaatttgaac tattaacgcattgggagtgcttgtgtgttagaggtctaggaggagctatgaggtactac |      |  |
| CNL288    | TTCCGTCAGGTCCAGCGTTTGTTGGAGATATGGAAGGAGGAGCTCTCTTGTTTATAGATGACCTCAACTCCAAGTGACA   | -57  |  |
| HZ4       | TTCCGTCAGGTCCAGCGTTTGTTGGAGATATGGAAGGAGGAGCTCTCTTGTTTATAGATGACCTCAACTCCAAGTGACA   | -57  |  |
| Consensus | ttccgtcaggtccagcgtttggttggagatatggaaggaggagctctcttgtttatagatgacctcaactccaagtgaca  |      |  |
| CNL288    | AAGTGAACAGCTGTTGAACTTCCCGTCTATTTCTGTTTCTTTTGGCTGGATTTGGA                          | -1   |  |
| HZ4       | AAGTGAACAGCTGTTGAACTTCCCGTCTATTTCTGTTTCTTTTGGCTGGATTTGGA                          | -1   |  |
| Consensus | aagtgaacagctgttgaacttcccgctctatttctgtttcttttggctggatttgg                          |      |  |

**Supplementary Figure 5** Sequence alignment of *ZmCCA1a* primers in CML288 and HZ4

DNA sequences identical between *ZmCCA1a* primers in CML288 and HZ4 are highlighted in black. Asterisks indicate nucleotide diversity between the two DNA sequences. The numbers on the right indicate positions of the last nucleotide upstream of the translation initiation site ATG.

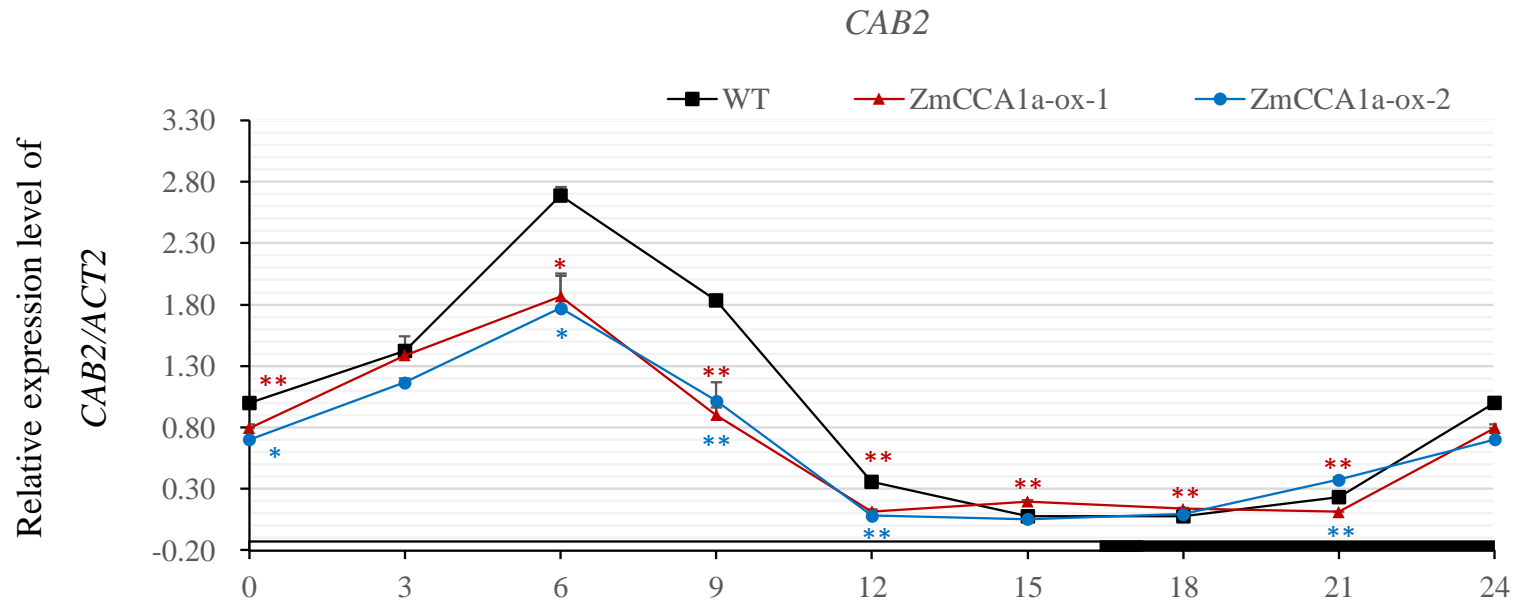

**Supplementary Figure 6** Diurnal oscillations in accumulation of *CAB2* transcripts in WT and *ZmCCA1a-ox* lines

*Arabidopsis* seeds were grown on MS plates under long days (LD) for 11 days. Seedlings (at least 10 plants for each line) were harvested at the start of ZT0 of day 12 and thereafter at 3-h intervals for 24 h. Experiments were performed three times with similar results. Relative transcript levels were normalized to the expression level of *CAB2* in the WT at ZT0. Expression levels of *CAB2* are shown as the average of three repeats. *ZmCCA1a-ox-1* and *ZmCCA1a-ox-2* indicate two lines of transgenic *Arabidopsis*. Day and night conditions are indicated with white and black bars on the horizontal axis. Error bars indicate standard error (n=3). Student's *t* test was used to analysis the significant differences in expression levels of target genes between WT and *ZmCCA1a-ox* lines. Significance levels of  $p < 0.05$  and  $p < 0.01$  were marked with \* and \*\* (red for *ZmCCA1a-ox-1* and blue for *ZmCCA1a-ox-2*) , respectively.
